# Supplementary material for: Recognition of lipoproteins by scavenger receptor class A members
Source: PubMed Central journal article supplement — J Biol Chem. 2021 Jul 9;297(2):100948. doi: 10.1016/j.jbc.2021.100948 (PMC8353498; doi:10.1016/j.jbc.2021.100948), 2021-07-09
Supplement: mmc1.pdf [file mmc1.pdf]

## Supplementary figures

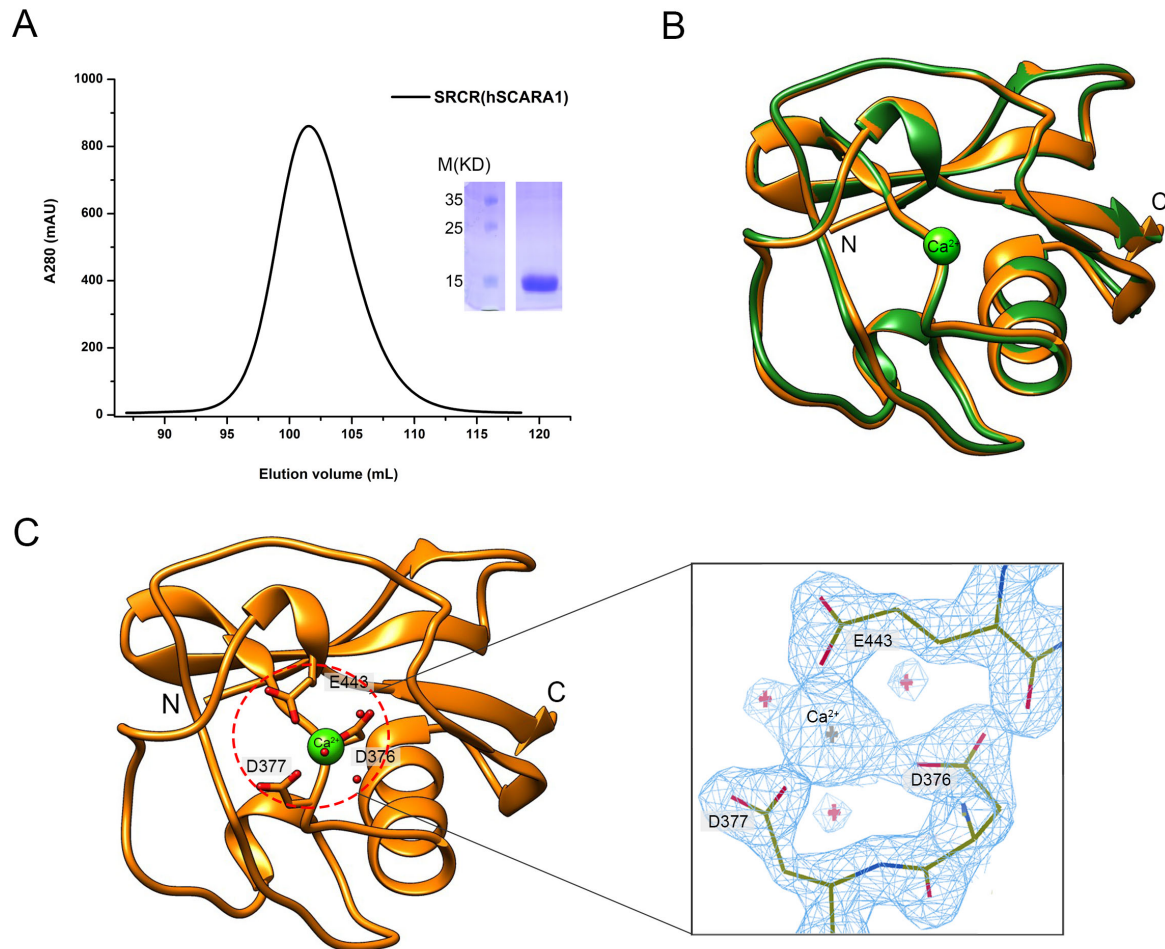

**Figure S1. Crystal structure of the SRCR domain of hSCARA1.**

(A) The SEC profile and SDS-PAGE of the SRCR domain of hSCARA1.

(B) Superposition of the crystal structures of the SRCR domains of hSCARA1 (orange) and mSCARA1 (green; PDB entry: 6J02). Ca<sup>2+</sup> is shown as a green sphere.

(C) *Left*, the crystal structure of the SRCR domain of hSCARA1 (orange). Water molecules are shown as small red spheres. *Right*, the electron density of the Ca<sup>2+</sup> (gray cross) binding site. Water molecules are indicated by red crosses.

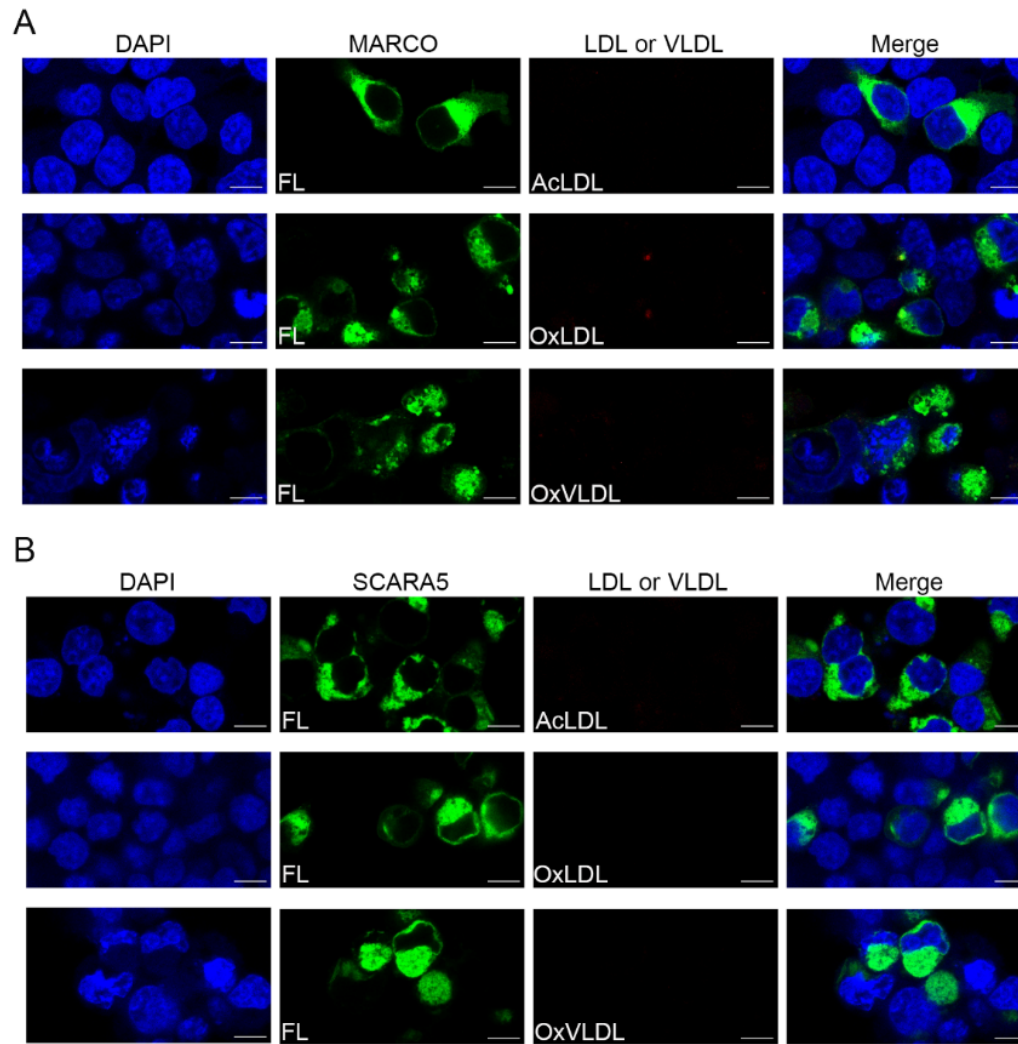

**Figure S2. MARCO or SCARA5 does not internalize the modified LDL or VLDL in the presence of EDTA.**

(A) Confocal fluorescent images of the hMARCO (with GFP tag) transfected cells incubated with the modified LDL or VLDL in the presence of EDTA (bar, 25  $\mu\text{m}$ ).

(B) Confocal fluorescent images of the hSCARA5 (with GFP tag) transfected cells incubated with the modified LDL or VLDL in the presence of EDTA (bar, 25  $\mu\text{m}$ ).

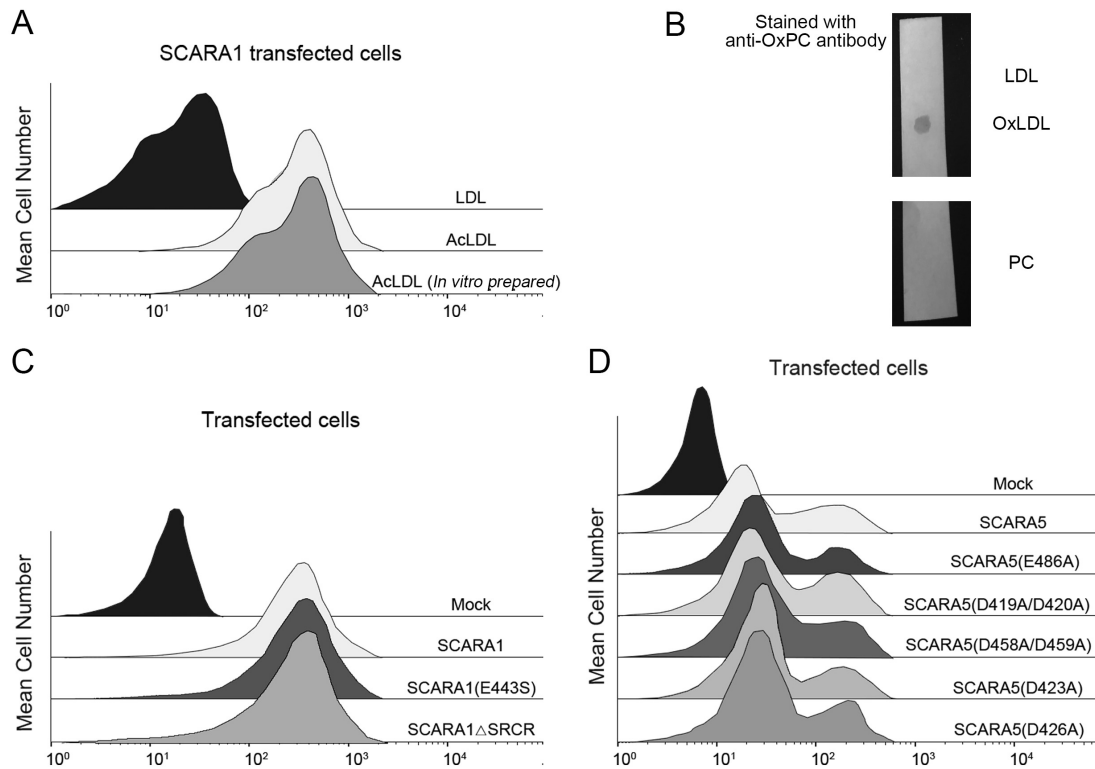

**Figure S3.**

(A) FACS data of the hSCARA1 transfected cells incubated with the AcLDL

prepared *in vitro* as well as the AcLDL isolated from human plasma.

(B) Dot-blot assay showed that OxPC was found on the OxLDL produced *in vitro*,

but not on LDL, and could be recognized by anti-OxPC antibody. Unmodified PC was applied as a negative control.

(C) FACS data showed the interactions of anti-SCARA1 antibody with the cells

transfected with the wild-type SCARA1, SCARA1(E443S) or SCARA1 $\Delta$ SRCR.

Mock represents non-transfected cells.

(D) FACS data showed the interactions of anti-SCARA5 antibody with the cells

transfected with the wild-type SCARA5, SCARA5(E486A),

SCARA5(D419A/D420A), SCARA5(D458A/D459A), SCARA5(D423A) or

SCARA5(D426A).

## Supplementary Table S1

**Table 1. Crystallographic Statistics of the Structure of the SRCR domain of human SCARA1**

|                             |                                          |
|-----------------------------|------------------------------------------|
| Data Collection and Scaling |                                          |
| Beamline                    | SSRF BL18U                               |
| Wavelength (Å)              | 0.98                                     |
| Space group                 | P 21 21 21                               |
| Cell parameters             |                                          |
| a, b, c (Å)                 | 37.03, 57.09, 62.22                      |
| a, b, g (°)                 | 90.00, 90.00, 90.00                      |
| Resolution (Å)              | 27.80 – 2.00 (2.07 – 2.00)               |
| R <sub>merge</sub>          | 0.091(0.571)                             |
| Unique reflections          | 29312 (9388)                             |
| I/σ(I)                      | 18.3 (4.3)                               |
| Completeness (%)            | 96.8 (95.5)                              |
| Multiplicity                | 4.3 (4.1)                                |
| Solvent content (%)         | 49                                       |
| Refinement                  |                                          |
| R <sub>work</sub>           | 0.208(0.223)                             |
| R <sub>free</sub>           | 0.252(0.158)                             |
| Protein atoms               | 905                                      |
| Solvent atoms               | 113 H <sub>2</sub> O, 1 Ca <sup>2+</sup> |
| Validation                  |                                          |
| RMSD bonds (Å)              | 0.006                                    |
| RMSD angles (°)             | 0.78                                     |
| Ramachandran favored (%)    | 98.0                                     |
| Ramachandran outliers (%)   | 0%                                       |

Note: Values in parentheses are for the highest-resolution shell.
